# Supplementary material for: Compliance with Good Manufacturing Practice in the Assessment of Immunomodulation Potential of Clinical Grade Multipotent Mesenchymal Stromal Cells Derived from Wharton’s Jelly
Source: MDPI journal article supplement (doi:10.3390/cells8050484), 2019-05-21
Supplement: s1 [file s1]

# Compliance with Good Manufacturing Practice in the Assessment of Immunomodulation Potential of Clinical Grade Multipotent Mesenchymal Stromal Cells Derived from Wharton's Jelly

Marta Grau-Vorster <sup>1,2</sup>, Luciano Rodríguez <sup>1</sup>, Anna del Mazo-Barbara<sup>1</sup>, Clémentine Mirabel<sup>1</sup>, Margarita Blanco<sup>1</sup>, Margarita Codinach<sup>1</sup>, Susana G. Gómez<sup>1</sup>, Sergi Querol<sup>1</sup>, Joan García-López <sup>1,3,\*</sup> and Joaquim Vives <sup>1,4,5,\*</sup>

<sup>1</sup> Banc de Sang i Teixits, Edifici Dr. Frederic Duran i Jordà, Passeig Taulat, 116, 08005 Barcelona, Spain.

<sup>2</sup> Transfusion Medicine Group, Vall d'Hebron Research Institute (VHIR), Universitat Autònoma de Barcelona, Passeig de la Vall d'Hebron 129-139, 08035 Barcelona, Spain.

<sup>3</sup> Chair of Transfusion Medicine and Cellular and Tissue Therapies, Universitat Autònoma de Barcelona, Campus UAB, Cerdanyola del Vallès, Bellaterra, Spain

<sup>4</sup> Musculoskeletal Tissue Engineering Group, Vall d'Hebron Research Institute (VHIR), Universitat Autònoma de Barcelona, Passeig de la Vall d'Hebron 129-139, 08035 Barcelona, Spain.

<sup>5</sup> Departament de Medicina, Universitat Autònoma de Barcelona, Passeig de la Vall d'Hebron 129-139, 08035 Barcelona, Spain. Affiliation 1; e-mail@e-mail.com

\* Correspondence: [jvives@bst.cat](mailto:jvives@bst.cat); Tel.: +34 935573500 ext. 6708 (J.V.); [joangarcia@bst.cat](mailto:joangarcia@bst.cat); Tel.: +34 935573500 ext. 6701 (J.G-L.)

**Table S1.** Severity rating for the FMEA analysis.

| Severity level | Qualitative severity level | Potential impact of the failure                                                       |
|----------------|----------------------------|---------------------------------------------------------------------------------------|
| 1              | Negligible                 | Will not alter CQA                                                                    |
| 2              | Minor                      | Unlikely to alter CQA                                                                 |
| 3              | Moderate                   | Likely to alter CQA and will potentially result in regulatory incompliance            |
| 4              | Critical                   | Undesirable CQA, will result in regulatory incompliance and will alter product safety |
| 5              | Catastrophic               | Highly alter the product safety                                                       |

CQA: Critical Quality Attribute

**Table S2.** Occurrence rating for the FMEA analysis.

| Occurrence level | Qualitative severity level | Potential impact of the failure                                                        |
|------------------|----------------------------|----------------------------------------------------------------------------------------|
| 1                | Negligible                 | Will not alter CQA                                                                     |
| 2                | Minor                      | Unlikely to alter CQA                                                                  |
| 3                | Moderate                   | Likely to alter CQA and will potentially result in regulatory noncompliance            |
| 4                | Critical                   | Undesirable CQA, will result in regulatory noncompliance and will alter product safety |
| 5                | Catastrophic               | Highly alter the product safety                                                        |

CQA: Critical Quality Attribute

**Table S3.** Detection rating for the FMEA analysis.

| Detection level | Qualitative detection level | Description of consequences                                                                          |
|-----------------|-----------------------------|------------------------------------------------------------------------------------------------------|
| 1               | Direct detection method     | Controls systems, in process controls that will be used as direct method for identifying the failure |
| 2               | Highly detectable           | Existing controls that are likely to detect the altered CQA                                          |
| 3               | Medium detectability        | Controls may detect the altered CQA                                                                  |
| 4               | Low detect ability          | Very unlikely that current control may detect the altered CQA                                        |
| 5               | Undetectable                | No available controls for the determination of a variation of CQA                                    |

CQA: Critical Quality Attribute

**Table 4.** Potential failures in the production of WJ-MS.

|                        |
|------------------------|
| Process                |
| Materials and reagents |
| Equipment              |
| People                 |
| Environment            |
| Documentation          |

Table S5. **Potential failures regarding product's dose.** Complete Failure Mode and Effects Analysis for cell number, cell viability and volume.

Table S6. **Potential failures regarding product's impurities.** Complete Failure Mode and Effects Analysis for sterility, *Mycoplasma*, endotoxins, and adventitious viruses.

Table S7. **Potential failures regarding product's identity.** Complete Failure Mode and Effects Analysis for phenotype and karyotype.

Table S8. **Potential failures regarding the immunopotency of WJ-MS.** Complete Failure Mode and Effects Analysis for immunomodulation potential.
